# Supplementary material for: Structural Basis of Natural Promoter Recognition by the Retinoid X Nuclear Receptor
Source: PubMed Central journal article supplement — Sci Rep. 2015 Feb 3;5:8216. doi: 10.1038/srep08216 (PMC4314640; doi:10.1038/srep08216), 2015-02-03
Supplement: srep08216-s1.pdf [file srep08216-s1.pdf]

## Supplementary information

### Structural Basis of Natural Promoter Recognition by Retinoid X Nuclear Receptor

Judit Osz<sup>1,&</sup>, Alastair G. McEwen<sup>2,&</sup>, Pierre Poussin-Courmontagne<sup>2</sup>, Emmanuel Moutier<sup>3</sup>, Catherine Birck<sup>2</sup>, Irwin Davidson<sup>3</sup>, Dino Moras<sup>1</sup>, Natacha Rochel<sup>1,\*</sup>

<sup>1</sup> Department of Integrative Structural Biology, <sup>2</sup> Structural Biology Platform, <sup>3</sup> Department of Functional Genomics and Cancer, Institut de Génétique et de Biologie Moléculaire et Cellulaire (IGBMC), Institut National de Santé et de Recherche Médicale (INSERM) U964 / Centre National de Recherche Scientifique (CNRS) UMR 7104 / Université de Strasbourg, 67404 Illkirch, France.

**Supplementary Fig. S1. Crystal packing of RXR-DBD-DNA complexes.** The asymmetric unit content is shown in green for (a) the dimeric RXR DBD-*Ramp2*, (b) the dimeric RXR-DBD-*Gde1SpA* and (c) the dimeric RXR-DBD-idDR1.

**a**

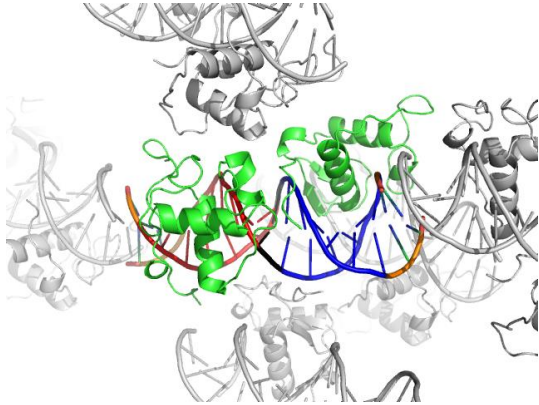

**b**

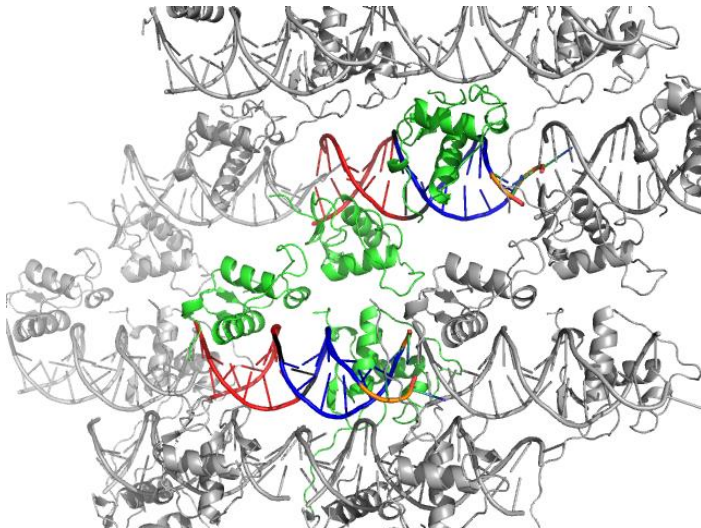

**c**

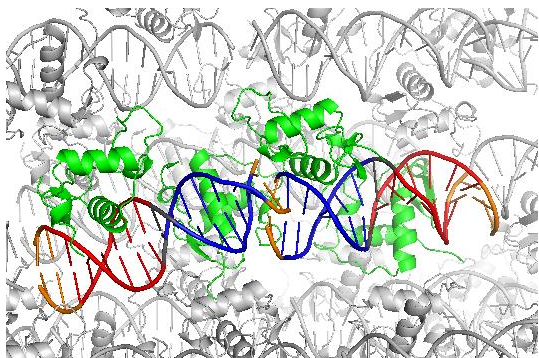

**Supplementary Fig. S2. Schematic representations of the protein-DNA contacts for the second dimer of the RXR-DBD-*id*DR1 complex.** Bridging water molecules are shown as black circles. The hydrogen-bond interactions with the 5' subunit and 3' subunit are highlighted in light grey and cyan, respectively. The first hexanucleotide is shown in salmon, the second one in blue and the interspacer nucleotide in grey. The gray circles indicate the DNA phosphates and the labeled residues their contacts with RXR.

### *id*DR1 dim2

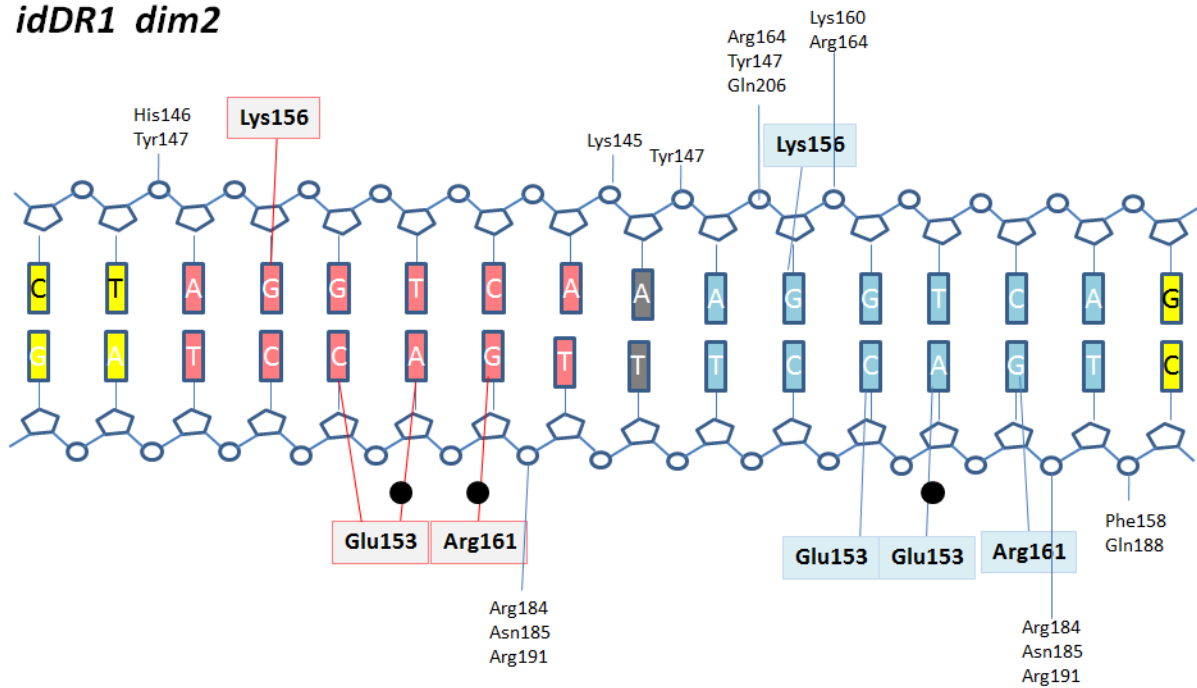

### *id*DR1 (PDB: 1BY4)

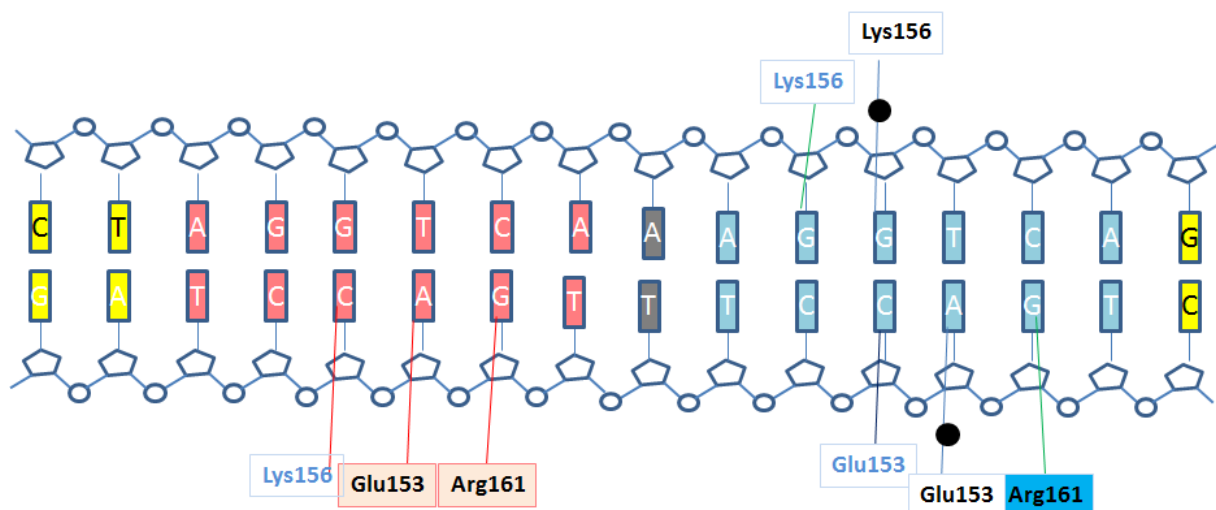

**Supplementary Fig. S3: Overall stabilization of the complexes as shown by the B-factor plot on the overall structure of the RXR-DBD-*Ramp2* (a) and RXR-DBD-*idDR1* (b) complexes. The protein secondary structural elements are colored by B-factors on a relative scale: highest B-factor, red; lowest B-factor, blue.**

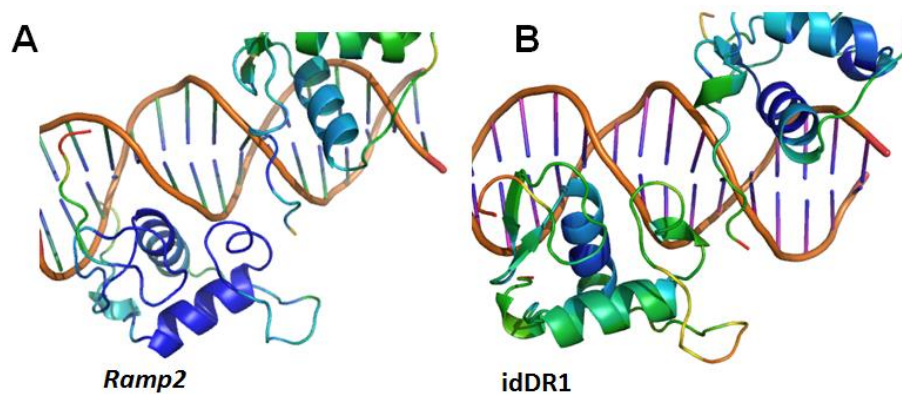

**Supplementary Fig. S4. 2Fo-Fc electron density maps of the dimerization interface of the RXR DBD complexes at  $1\sigma$ . The  $C\alpha$  chain is shown in yellow and pink for the RXR DBD monomers.**

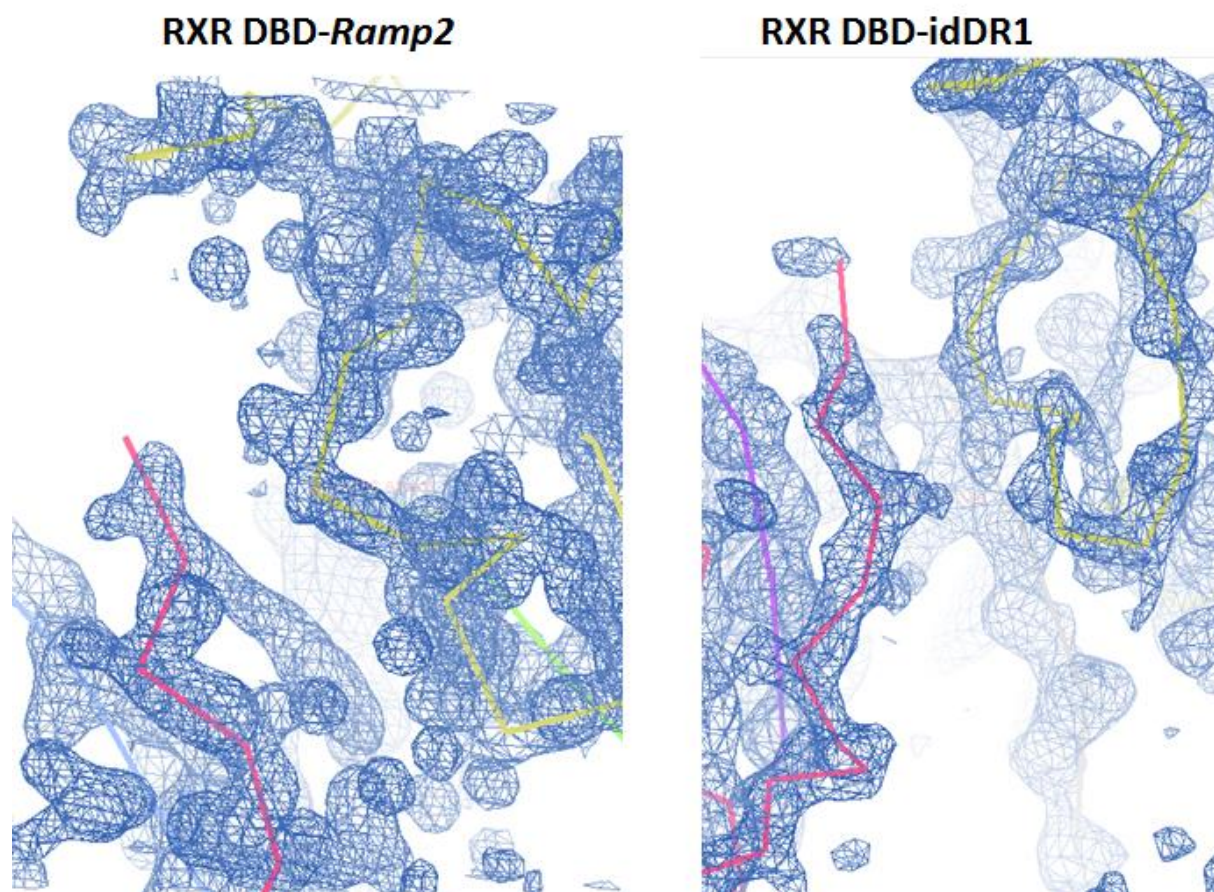

**Supplementary Fig. S5. Comparison of RXR-DBD-*Ramp2* structure with RXR dimer-idDR1.**  
(a) Superimposed crystal structures of RXR DBD-*Ramp2* (cyan) with RXR DBD-idDR1 (PDB ID: 1BY4, grey). Superposition was performed on the 3' bound RXR DBD. The largest differences are observed for the idDR1 as indicated by arrows and a zoomed view of the dimerization region. (b) Superimposed crystal structures of RXR DBD-*Ramp2* (cyan) with PPAR-RXR-idDR1 (PDB ID: 3DZY, orange).

**a**

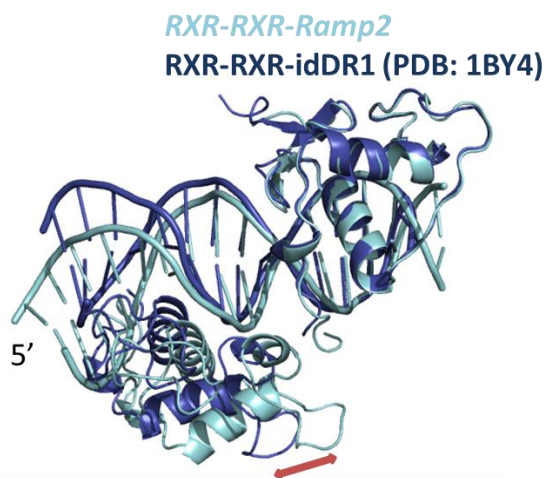

**b**

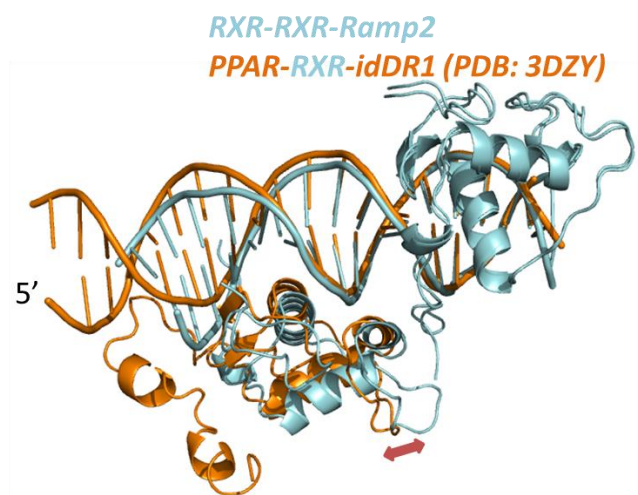

**Supplementary Fig. S6. Comparison of the dimerization interface.** Surface representation of the dimerization interfaces of *Ramp2*, *Nr1d1* and idDR1 RXR-DBDs complexes. The complexes with the natural DR1s show the largest dimerization interactions (highlighted in violet) compared to the complex with idDR1.

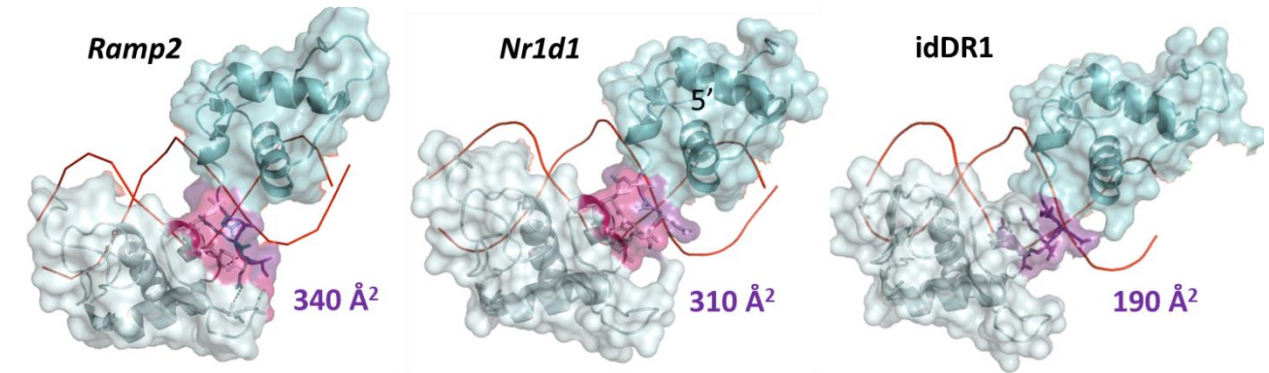

## Supplementary Table S1. X-ray data collection and refinement statistics of RXR-DBD complexes.

| PDB ID                                              | <i>Ramp2</i><br>4CN2                                                                                  | <i>Nr1d1</i><br>4CN5                                                                                 | <i>Gde1SpA</i><br>4CN3                                                                        | <i>idDR1</i><br>4CN7                                                                          |
|-----------------------------------------------------|-------------------------------------------------------------------------------------------------------|------------------------------------------------------------------------------------------------------|-----------------------------------------------------------------------------------------------|-----------------------------------------------------------------------------------------------|
| Data Collection                                     |                                                                                                       |                                                                                                      |                                                                                               |                                                                                               |
| X ray source                                        | ESRF ID23-1                                                                                           | ESRF BM30A                                                                                           | ESRF ID23-2                                                                                   | ESRF ID23-2                                                                                   |
| Detector                                            | ADSC Q315R                                                                                            | ADSC Q315R                                                                                           | MAR CCD 225                                                                                   | MAR CCD 225                                                                                   |
| Wavelength (Å)                                      | 1,283                                                                                                 | 1,283                                                                                                | 0,873                                                                                         | 0,873                                                                                         |
| Temperature                                         | 100K                                                                                                  | 100K                                                                                                 | 100K                                                                                          | 100K                                                                                          |
| Resolution (Å)                                      | 25 – 2.06 (2.10 – 2.06)                                                                               | 43.0 – 2.0 (2.05 – 2.00)                                                                             | 69.6 – 2.30 (2.42 – 2.30)                                                                     | 40.8 – 2.34 (2.42 – 2.35)                                                                     |
| Space Group                                         | C2                                                                                                    | C2                                                                                                   | P212121                                                                                       | P212121                                                                                       |
| Unit cell parameters                                | a = 113.234Å b = 43.952Å c = 63.316Å<br>$\alpha = 90^\circ, \beta = 106.016^\circ, \gamma = 90^\circ$ | a = 103.286Å b = 44.327Å c = 63.915Å<br>$\alpha = 90^\circ, \beta = 98.950^\circ, \gamma = 90^\circ$ | a = 53.07Å b = 69.47Å c = 139.13Å<br>$\alpha = 90^\circ, \beta = 90^\circ, \gamma = 90^\circ$ | A = 37.63Å b = 65.35Å c = 209.12Å<br>$\alpha = 90^\circ, \beta = 90^\circ, \gamma = 90^\circ$ |
| Total reflections                                   | 32567                                                                                                 | 67786                                                                                                | 135293                                                                                        | 97410                                                                                         |
| Unique reflections                                  | 17566                                                                                                 | 19176                                                                                                | 23573                                                                                         | 22310                                                                                         |
| Completeness (%)                                    | 95.3 (70.8)                                                                                           | 98.3 (98.9)                                                                                          | 95.1 (86.8)                                                                                   | 98.4 (86.7)                                                                                   |
| Rmerge (%)                                          | 8.1 (21.9)                                                                                            | 2.8 (11.8)                                                                                           | 14.3 (46.6)                                                                                   | 6.7 (102.4)                                                                                   |
| Mean I/ $\sigma$ (I)                                | 15.9 (4.2)                                                                                            | 27.2 (9.4)                                                                                           | 9.7 (3.5)                                                                                     | 11.3 (1.1)                                                                                    |
| Multiplicity                                        | 3.1 (1.8)                                                                                             | 3.5 (3.4)                                                                                            | 6.0 (5.6)                                                                                     | 4.4 (3.9)                                                                                     |
| Wilson B                                            | 29,64                                                                                                 | 22,78                                                                                                | 38,55                                                                                         | 36,5                                                                                          |
| Model Refinement                                    |                                                                                                       |                                                                                                      |                                                                                               |                                                                                               |
| <i>R</i> <sub>work</sub> / <i>R</i> <sub>free</sub> | 0.154/0.202                                                                                           | 0.167/0.228                                                                                          | 0.183/0.249                                                                                   | 0.173/0.209                                                                                   |
| No. of non-H atoms                                  | 2260                                                                                                  | 2298                                                                                                 | 4311                                                                                          | 3925                                                                                          |
| Protein/DNA                                         | 2022                                                                                                  | 1970                                                                                                 | 3980                                                                                          | 3771                                                                                          |
| Water                                               | 222                                                                                                   | 315                                                                                                  | 323                                                                                           | 151                                                                                           |
| Ligand/ion                                          | 12/4                                                                                                  | 13                                                                                                   | 8                                                                                             | 3                                                                                             |
| Average <i>B</i> factor (Å <sup>2</sup> )           |                                                                                                       |                                                                                                      |                                                                                               |                                                                                               |
| Protein/DNA                                         | 37,87                                                                                                 | 35,6                                                                                                 | 27,96                                                                                         | 67,46                                                                                         |
| Water                                               | 41,55                                                                                                 | 38,55                                                                                                | 30,174                                                                                        | 53,94                                                                                         |
| Ligand/ion                                          | 44.14/45.87                                                                                           | 48,08                                                                                                | 26,85                                                                                         | 81,88                                                                                         |
| R.m.s. Deviations                                   |                                                                                                       |                                                                                                      |                                                                                               |                                                                                               |
| Bond lengths (Å)                                    | 0,01                                                                                                  | 0,006                                                                                                | 0,01                                                                                          | 0,009                                                                                         |
| Bond angles (°)                                     | 1,11                                                                                                  | 1,187                                                                                                | 1,23                                                                                          | 1,192                                                                                         |
| Ramachandran plots                                  |                                                                                                       |                                                                                                      |                                                                                               |                                                                                               |
| Favoured (%)                                        | 92,4                                                                                                  | 94,7                                                                                                 | 91,5                                                                                          | 96,4                                                                                          |
| Allowed (%)                                         | 7,6                                                                                                   | 5,3                                                                                                  | 8,4                                                                                           | 3,6                                                                                           |
| Outliers (%)                                        | 0                                                                                                     | 0                                                                                                    | 0                                                                                             | 0                                                                                             |
